# Supplementary material for: Development and Validation of a UAV Based System for Air Pollution Measurements
Source: MDPI journal article supplement (doi:10.3390/s16122202), 2016-12-21
Supplement: s1 [file s1]

# Supplementary Materials: Development and Validation of a UAV Based System for Air Pollution Measurements

Tommaso Francesco Villa, Farhad Salimi, Kye Morton, Lidia Morawska and Felipe Gonzalez

**Table S1.** DISCmini technical specifications.

| <b>Mean Particle Size</b> | <b>10 to 300 nm (Modal Diameter)</b>                                                                                                                              |
|---------------------------|-------------------------------------------------------------------------------------------------------------------------------------------------------------------|
| Particles counted         | 10 to 700 nm                                                                                                                                                      |
| Particle concentration    | Detectable particle concentrations depend on particle size and averaging time. Typical values are given below. 20 nm: 2E3 to 1E6 pt/ccm 100 nm: 5E2 to 5E5 pt/ccm |
| Accuracy                  | ±30% in size and number typical; ±5E2/ccm absolute in number                                                                                                      |
| Flow rate                 | 1.0 L/min ± 0.1 L/min                                                                                                                                             |
| Pressure                  | 800 to 1100 mbar abs ambient; $\Delta p$ max. at inlet: ±20 mbar                                                                                                  |
| Temperature               | +10 to +30 °C; relative humidity                                                                                                                                  |
| Time resolution           | 1 s                                                                                                                                                               |
| Dimensions                | 120 mm× 80 mm× 40 mm                                                                                                                                              |
| Weight                    | 0.7 kg                                                                                                                                                            |
| Power requirements        | The battery charger is compatible with the any 100 to120 v or 200 to 240 v 50/60 Hz AC wall outlet                                                                |
| Battery lifetime          | 8 h typical; varies with ambient temperature. Charging time 2 to 4 h depending on charger and status of battery.                                                  |

**Table S2.** Sensor features of the customized payload. Source: Sensor datasheets. nA: nanoampere; ppm: part per million; ppb: part per billion; FS: full scale. Table S2 reports the six different gas sensors which were integrated and tested as part of the hexacopter payload. However, the SO<sub>2</sub> and O<sub>3</sub> sensors did not perform, giving unrealistic values and therefore the data collected by these sensors were not considered.

| Sensor          | Sensitivity<br>(nA/ppm at 2 ppm) | Response Time                                                                                                                     | Zero current (nA in<br>Zero Air at 20 °C) | Noise ±2 Standard<br>Deviations<br>(ppb Equivalent) | Range (ppm)                                                | Linearity                                                                                      | Over Gas Limit<br>(Maximum ppm for<br>Stable Response to<br>Gas Pulse) |
|-----------------|----------------------------------|-----------------------------------------------------------------------------------------------------------------------------------|-------------------------------------------|-----------------------------------------------------|------------------------------------------------------------|------------------------------------------------------------------------------------------------|------------------------------------------------------------------------|
| CO              | CO<br>420 to 650                 | t90 (s) from zero to 10<br>ppm CO < 25                                                                                            | +30 to -130                               | 4                                                   | ppm limit<br>of performance<br>warranty 1000               | ppb CO error at full scale,<br>linear at zero, 500 ppm<br>CO 20 to 35                          | 2000                                                                   |
| SO <sub>2</sub> | SO <sub>2</sub><br>275 to 475    | t90 (s) from zero to 2 ppm<br>SO <sub>2</sub> < 30                                                                                | -80 to +80                                | 5                                                   | ppm limit<br>of performance<br>warranty 100                | ppb error at 100 ppm SO <sub>2</sub> ,<br>linear at zero and 10 ppm<br>SO <sub>2</sub> 0 to -2 | 200                                                                    |
| NO              | NO<br>500 to 850                 | t90 (s) from zero to 2 ppm<br>NO < 45                                                                                             | 30 to 140                                 | 15                                                  | ppm NO limit<br>of performance<br>warranty 20              | ppb error at full scale, linear<br>at zero and 5 ppm NO < ±1                                   | 50                                                                     |
| NO <sub>2</sub> | NO <sub>2</sub><br>-223 to -470  | t90 (s) from zero to 2 ppm<br>NO <sub>2</sub> < 35                                                                                | 0 to 70                                   | 15                                                  | ppm NO <sub>2</sub> limit<br>of performance<br>warranty 20 | ppm error at full scale, linear<br>at zero and 20 ppm<br>NO <sub>2</sub> < ±0.5                | 50                                                                     |
| O <sub>3</sub>  | O <sub>3</sub><br>-225 to -525   | t90 (s) from zero to 1 ppm<br>O <sub>3</sub> < 35                                                                                 | -50 to 70                                 | 15                                                  | ppm O <sub>3</sub> limit<br>of performance<br>warranty 20  | ppm error at full scale, linear<br>at zero and 20 ppm O <sub>3</sub><br>< ±0.5                 | 50                                                                     |
| CO <sub>2</sub> | 0 to 10,000 ppm                  | Response Time<br>• 30 s to 2 min (user<br>Configurable) 3<br>• Reading refreshed twice<br>per second 3<br>Warm-up Time<br>• <10 s |                                           | Low noise<br>measurement<br>(<10 ppm)               |                                                            | Non Linearity<br>• <1% of FS                                                                   |                                                                        |

Figure S1 shows both the hardware and software of the UAV system, including the ground control station, with the connection types between the different UAV components highlighted. Dark lines indicate physical connections, i.e., for motors and props, while red arrows show the human input into the platform. The data link among the onboard components is represented by orange arrows. The dash-lines linking the UAV platform and payload components with those of the ground control station indicate wireless connections.

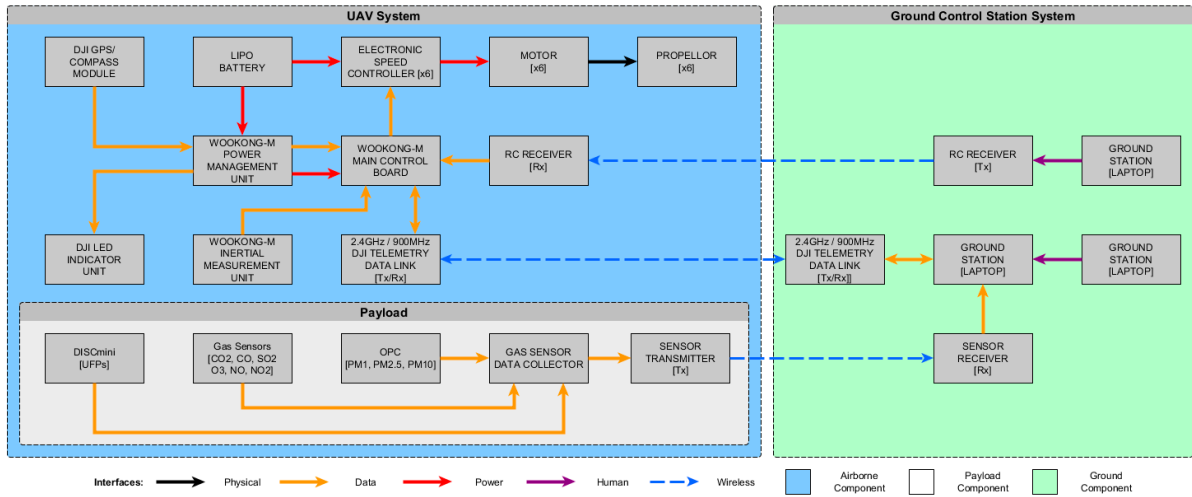

Figure S1. UAV and ground base system architecture.

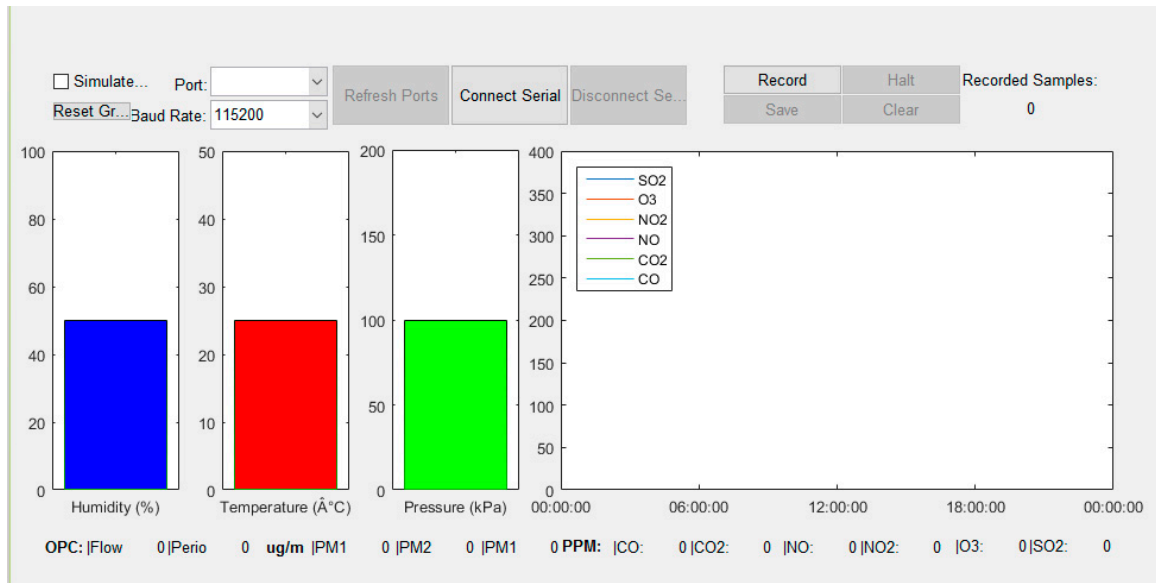

Figure S2. Ground Control Interface screenshot.

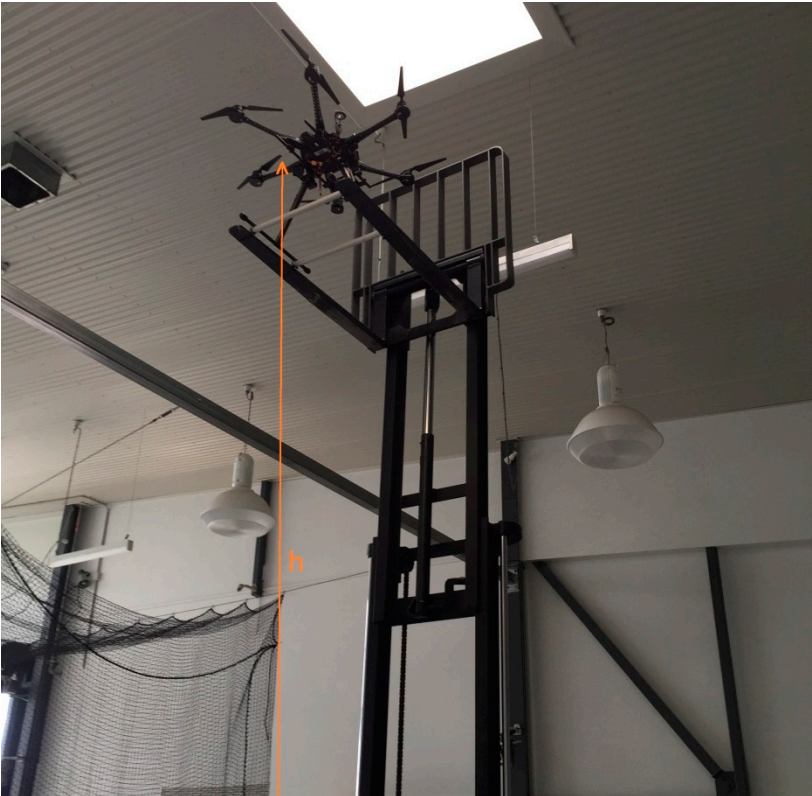

Figure S3. The S800 EVO fixed to the forklift inside the flight area.

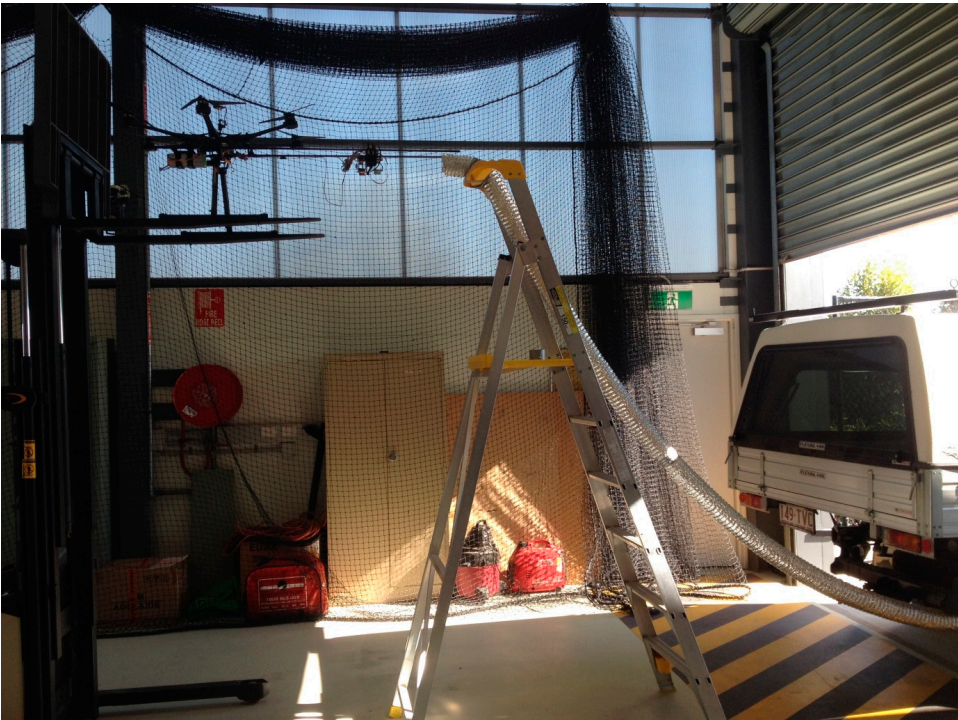

Figure S4. Experimental set up for Test 2.

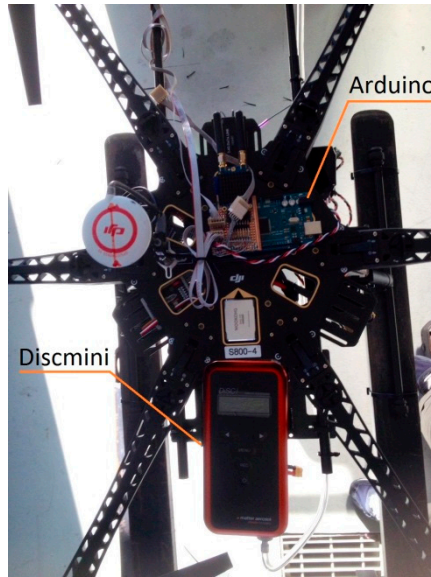

Figure S5. Discmini sensor mounted on S800 UAV.

## Appendix A

- *Experiment 1*

### Humidity and Temperature On-Board the UAV

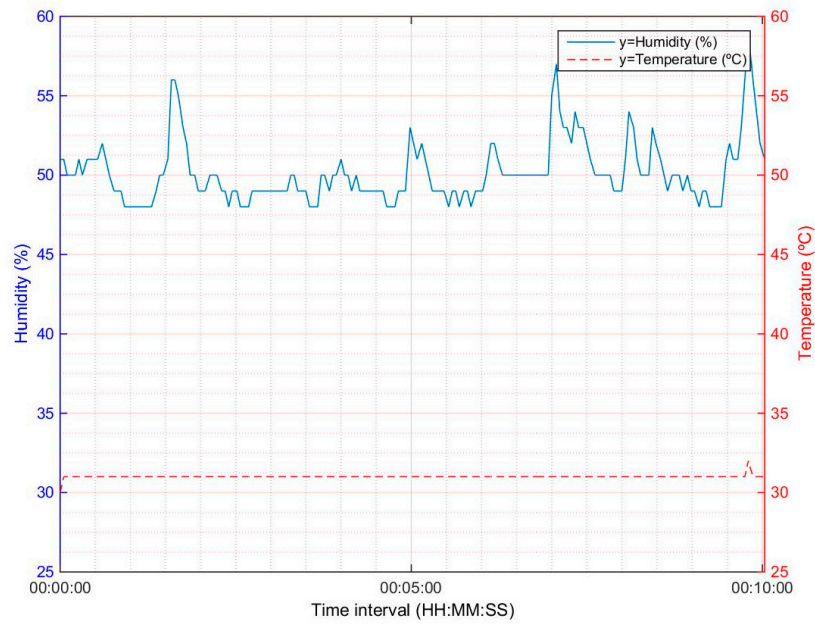

Figure S6a. Humidity and temperature measurements in experiment 1 with the sensors at 1100 mm from the centre of the UAV, the propellers turned off and the UAV at 2500 mm from the ground, in front of the exhaust.

- *Experiment 2a*

### Humidity and Temperature On-Board the UAV

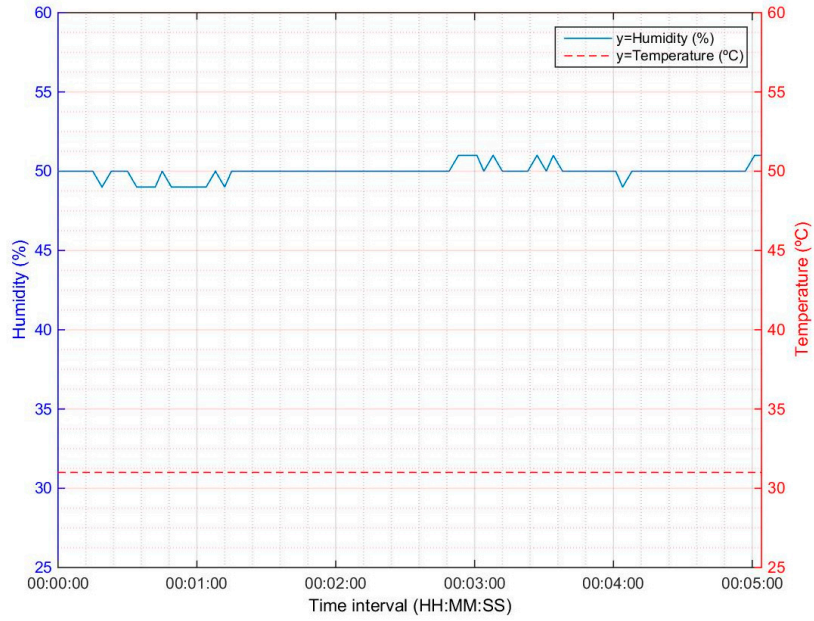

**Figure S6b.** Humidity and temperature measurements in experiment 2a, inside the plume. The sensors position was at 1100 mm from the centre of the UAV, the propellers turned on and the UAV at 2500 mm from the ground, in front of the exhaust.

- *Experiment 2b*

Humidity and Temperature On-Board the UAV

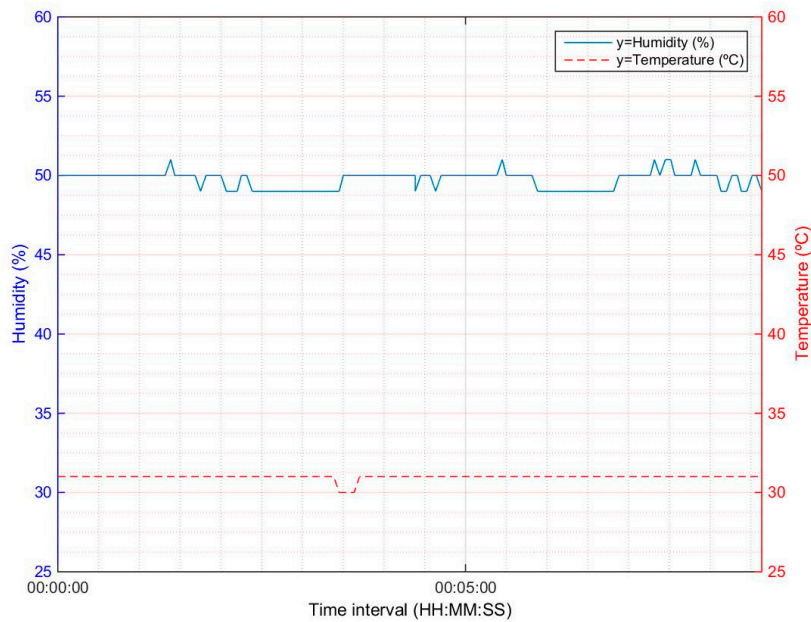

**Figure S6c.** Humidity and temperature measurements in experiment 2b, inside the plume. The sensors position was at 700 mm from the centre of the UAV, the propellers turned on and the UAV at 2500 mm from the ground, in front of the exhaust.

- *Experiment 3a*

## Humidity and Temperature On-Board the UAV

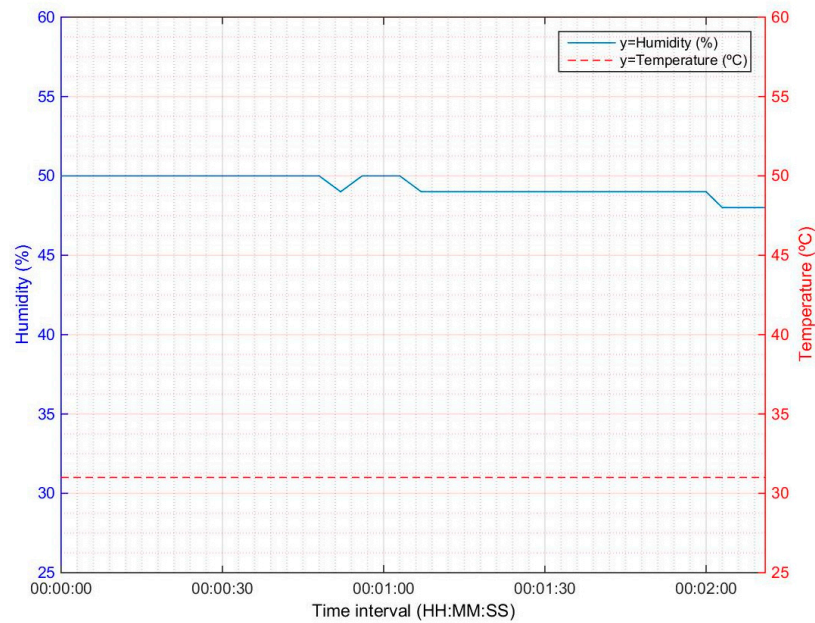

**Figure S6d.** Humidity and temperature measurements in experiment 3a, above the plume. The sensors position was at 1100 mm from the centre of the UAV, the propellers turned on and the UAV at 3200 mm from the ground, 700 mm above the exhaust.

- *Experiment 3b*

## Humidity and Temperature On-Board the UAV

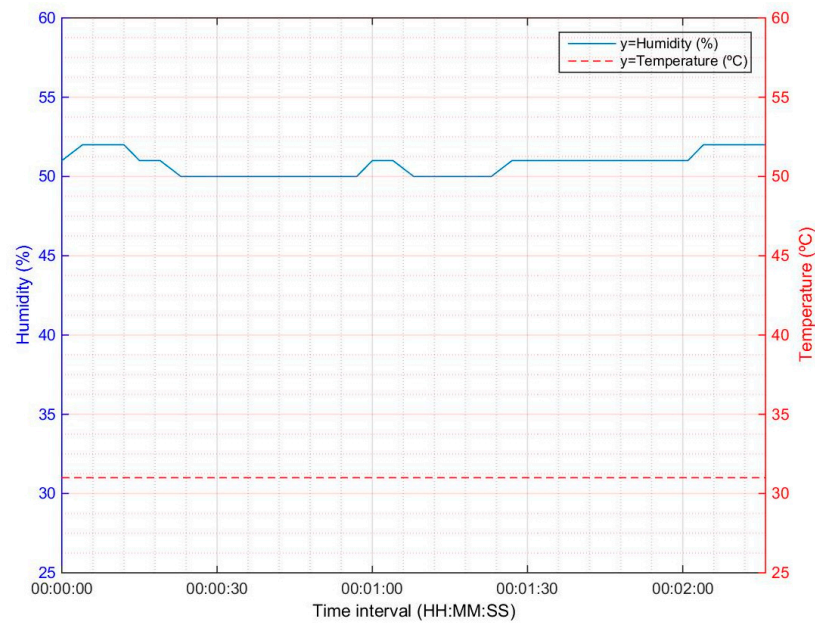

**Figure S6e.** Humidity and temperature measurements in experiment 3b, above the plume. The sensors position was at 700 mm from the centre of the UAV, the propellers turned on and the UAV at 3200 mm from the ground, 700 mm above the exhaust.

- *Experiment 4a*

## Humidity and Temperature On-Board the UAV

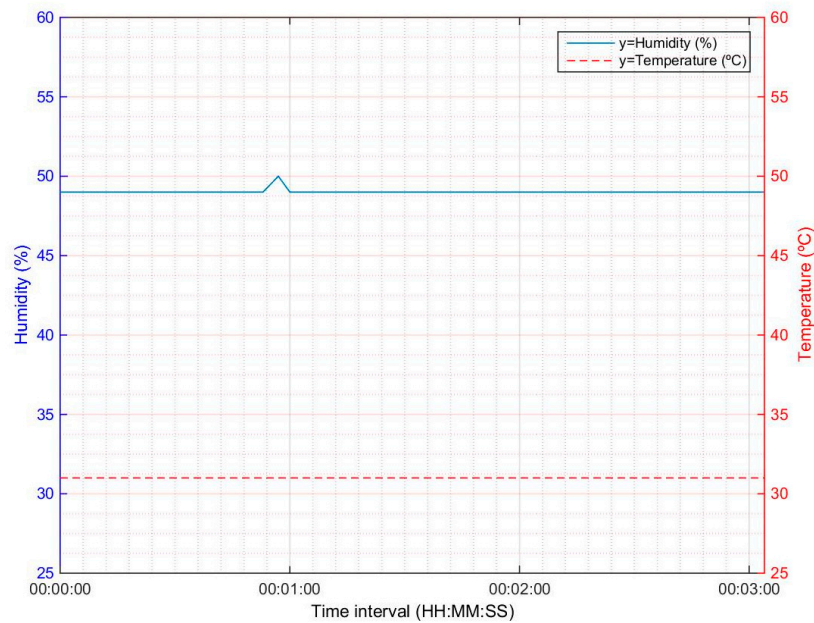

**Figure S6f.** Humidity and temperature measurements in experiment 4a, below the plume. The sensors position was at 1100 mm from the centre of the UAV, the propellers turned on and the UAV at 1800 mm from the ground, 700 mm below the exhaust.

- *Experiment 4b*

## Humidity and temperature on-board the UAV

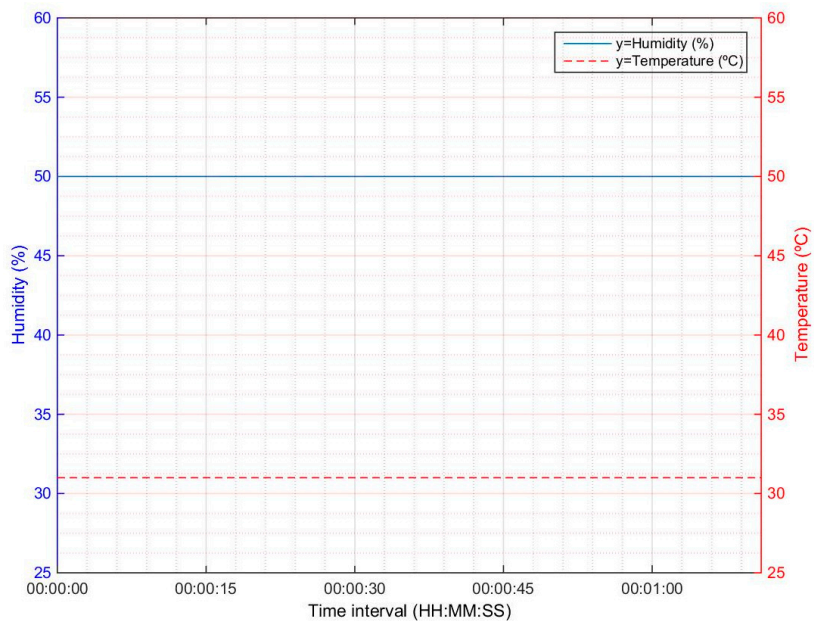

**Figure S6g.** Humidity and temperature measurements in experiment 4b, below the plume. The sensors position was at 700 mm from the centre of the UAV, the propellers turned on and the UAV at 1800 mm from the ground, 700 mm below the exhaust.
